# Supplementary material for: Self-reported healthcare waste segregation practice and its correlate among healthcare workers in hospitals of Southeast Ethiopia
Source: Springer Nature journal article supplement (doi:10.1186/s12913-019-4439-9), 2019-08-22
Supplement: MOESM1 [file 17093752]

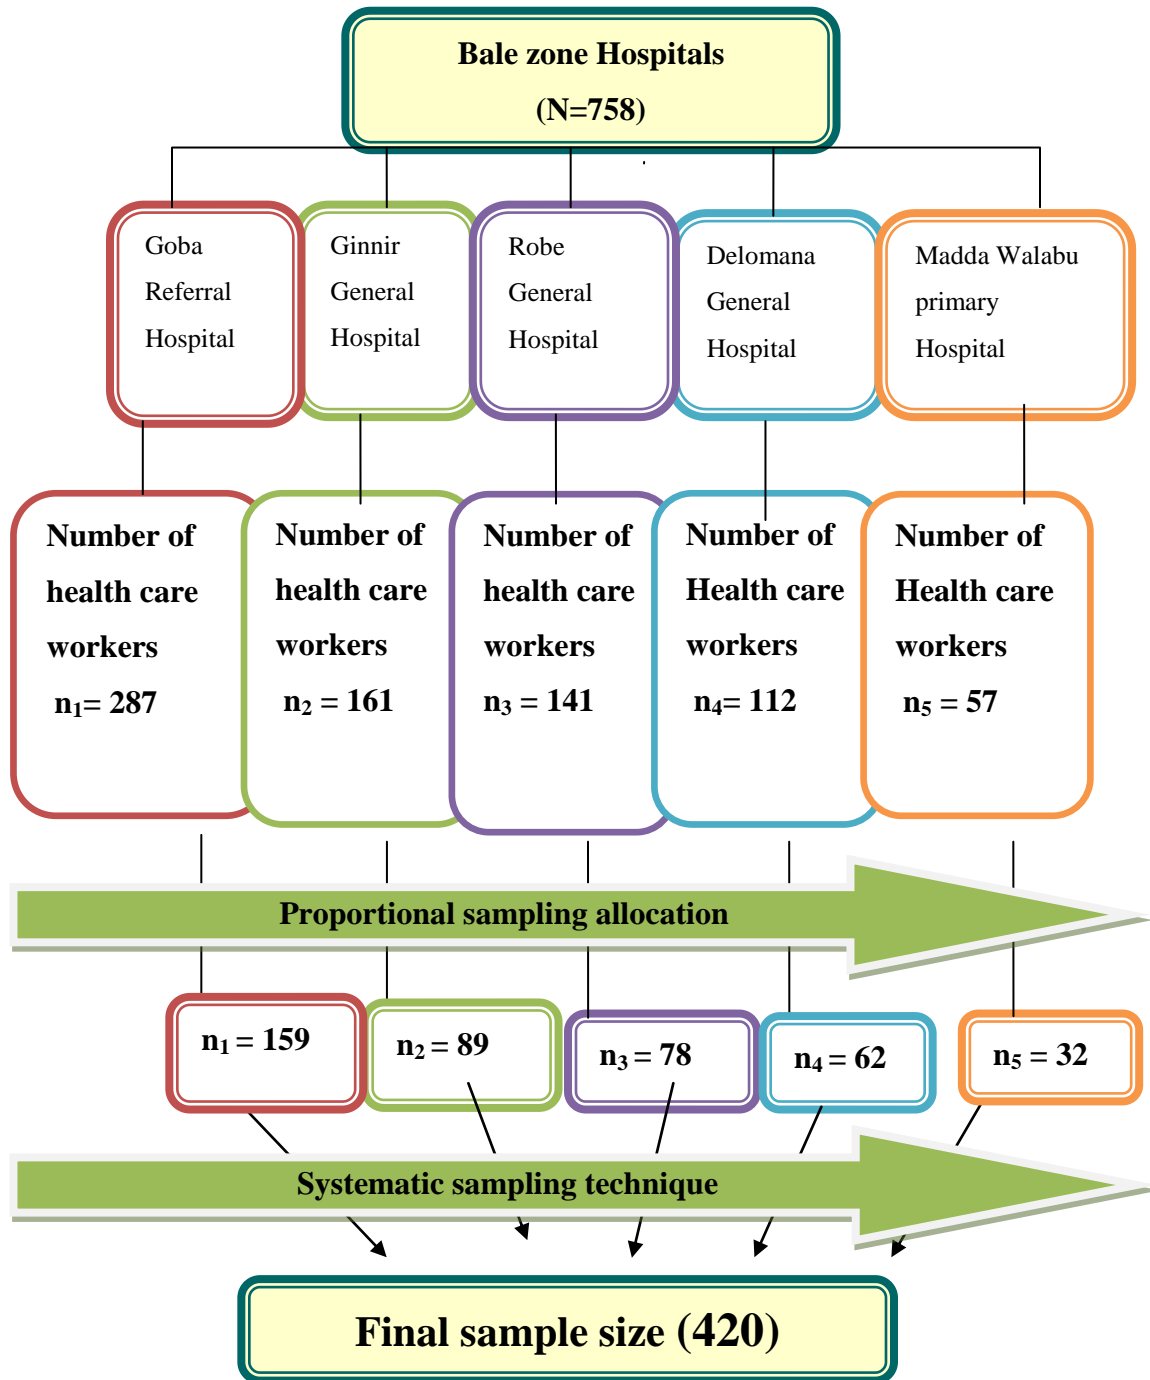

Figure 1: Schematic presentation of sampling procedure
