# Supplementary material for: Self-reported healthcare waste segregation practice and its correlate among healthcare workers in hospitals of Southeast Ethiopia
Source: Springer Nature journal article supplement (doi:10.1186/s12913-019-4439-9), 2019-08-22
Supplement: MOESM2 [file 17093752]

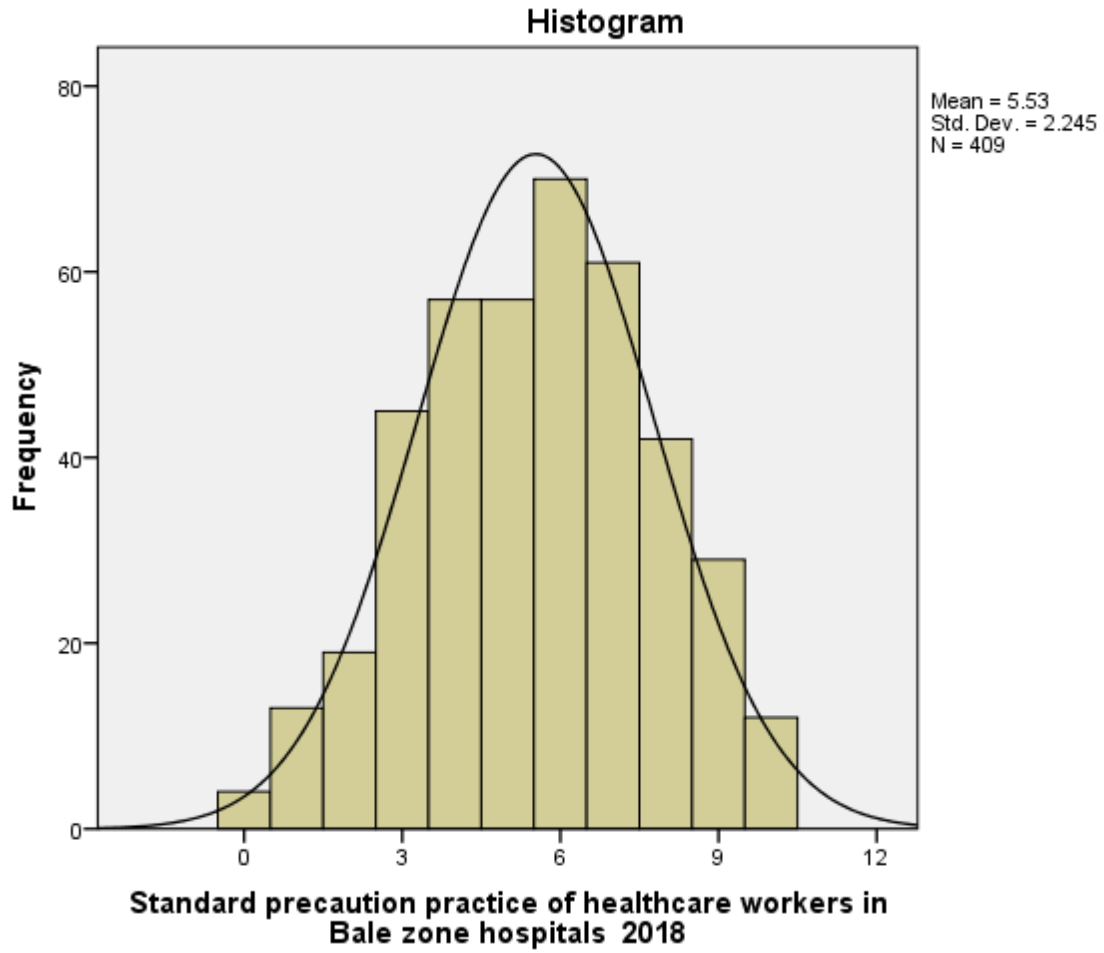

Figure 1: Standard precaution practice composite score distribution of healthcare workers in Bale zone, Southeast Ethiopia 2018.
